# Supplementary material for: Foundational Movement Skills and Play Behaviors during Recess among Preschool Children: A Compositional Analysis
Source: MDPI journal article supplement (doi:10.3390/children8070543), 2021-06-24
Supplement: s1 [file s1]

## Supplementary file. Compositional variation matrices of time spent in SOCARP variables

**Table S1.** Table reporting variation matrices of time spent in different activity levels.

|             | <b>Lying</b> | <b>Sitting</b> | <b>Standing</b> | <b>Walking</b> | <b>Very Active</b> |
|-------------|--------------|----------------|-----------------|----------------|--------------------|
| Lying       | 0.000        | 3.146          | 2.269           | 1.865          | 2.874              |
| Sitting     | 3.146        | 0.000          | 2.966           | 3.405          | 4.624              |
| Standing    | 2.269        | 2.966          | 0.000           | 1.526          | 2.913              |
| Walking     | 1.865        | 3.405          | 1.526           | 0.000          | 1.686              |
| Very Active | 2.874        | 4.624          | 2.913           | 1.686          | 0.000              |

Note. A value close to zero implies that the two parts involved in the ratio (arranged by the rows and columns in the matrix) are highly proportional.

**Table S2.** Table reporting variation matrices of time spent in different group sizes.

|        | <b>Alone</b> | <b>Small</b> | <b>Medium</b> | <b>Large</b> |
|--------|--------------|--------------|---------------|--------------|
| Alone  | 0.000        | 3.679        | 5.958         | 3.033        |
| Small  | 3.679        | 0.000        | 3.600         | 2.299        |
| Medium | 5.958        | 3.600        | 0.000         | 2.705        |
| Large  | 3.033        | 2.299        | 2.705         | 0.000        |

Note. A value close to zero implies that the two parts involved in the ratio (arranged by the rows and columns in the matrix) are highly proportional.

**Table S3.** Table reporting variation matrices of time spent in different activity types.

|                          | <b>AE</b> | <b>AW</b> | <b>Sedentary Be-<br/>haviour</b> | <b>Inactive Play</b> | <b>Locomotion</b> |
|--------------------------|-----------|-----------|----------------------------------|----------------------|-------------------|
| AE                       | 0.000     | 8.501     | 7.805                            | 6.663                | 7.143             |
| AW                       | 8.501     | 0.000     | 5.454                            | 6.474                | 4.017             |
| Sedentary Behav-<br>iour | 7.805     | 5.454     | 0.000                            | 5.451                | 3.207             |
| Inactive Play            | 6.663     | 6.474     | 5.451                            | 0.000                | 5.270             |
| Locomotion               | 7.143     | 4.017     | 3.207                            | 5.270                | 0.000             |

Notes. AE: Active Games with Equipment; AW: Active Games without Equipment (%). A value close to zero implies that the two parts involved in the ratio (arranged by the rows and columns in the matrix) are highly proportional.
